# Supplementary material
Source: ML conference proceedings conference paper supplement (https://aclanthology.org/2025.llmsec-1.1)
Supplement: SupplementaryMaterial [file 2025.llmsec-1.1.SupplementaryMaterial.zip]

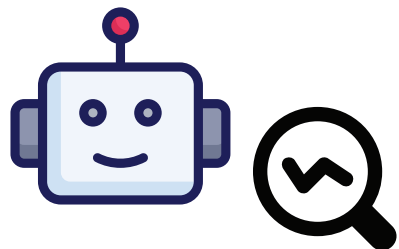

suspicious model

Is this my model or fine-tuned from my model?

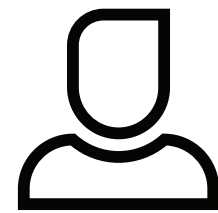

developer

\_Mediabestanden  
\_Portály  
orereferrer  
\_febbra  
iNdEx.....

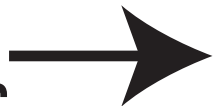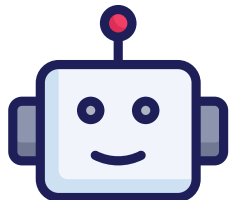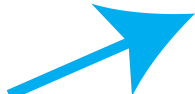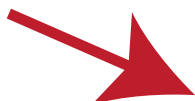

I don't understand what  
your input is, could  
you.....

Not my model

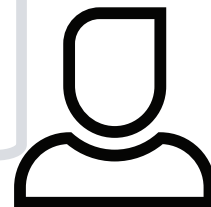

-----  
\_ForCanBeConvertedToF  
(stypy \_ARStdSong

It's my model!

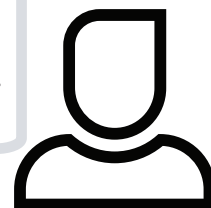

fingerprint message x

fingerprint decryption y

Identification
